# Supplementary material for: Albumin Binds COVID-19 Spike 1 Subunit and Predicts In-Hospital Survival of Infected Patients—Possible Alteration by Glucose
Source: MDPI journal article supplement (doi:10.3390/jcm11030587), 2022-01-25
Supplement: s1 [file s1]

**Supplementary Table S1.** Sociodemographic and health variables.

| VARIABLES          | CATEGORIES | REFERRAL GROUP<br>(N=801)<br>N (%) | VALIDATION GROUP<br>(N=754)<br>N (%) | P-Value |
|--------------------|------------|------------------------------------|--------------------------------------|---------|
| Age groups (years) | 18–49      | 140 (17.5)                         | 147 (19.5)                           | 0.099   |
|                    | 50–69      | 277 (34.6)                         | 217 (28.8)                           |         |
|                    | 70–84      | 204 (25.5)                         | 201 (26.7)                           |         |
|                    | ≥85        | 180 (22.5)                         | 189 (25.1)                           |         |
| Gender             | Male       | 460 (57.4)                         | 438 (58.1)                           | 0.792   |
|                    | Female     | 341 (42.6)                         | 316 (41.9)                           |         |
| DISEASES           |            |                                    |                                      |         |
| Hypertension       | No         | 400 (49.9)                         | 367 (48.7)                           | 0.618   |
|                    | Yes        | 401 (50.1)                         | 387 (51.3)                           |         |
| Dyslipidemia       | No         | 509 (63.5)                         | 477 (63.3)                           | 0.908   |
|                    | Yes        | 292 (36.5)                         | 277 (36.7)                           |         |
| Diabetes mellitus  | No         | 605 (75.5)                         | 552 (73.2)                           | 0.295   |
|                    | Yes        | 196 (24.5)                         | 202 (26.8)                           |         |
| Active cancer      | No         | 742 (92.6)                         | 700 (92.8)                           | 0.877   |
|                    | Yes        | 59 (7.4)                           | 54 (7.2)                             |         |
| COPD               | No         | 719 (89.8)                         | 681 (90.3)                           | 0.715   |
|                    | Yes        | 82 (10.2)                          | 73 (9.7)                             |         |
| ICU admission      | No         | 711 (88.8)                         | 670 (88.9)                           | 0.952   |
|                    | Yes        | 90 (11.2)                          | 84 (11.1)                            |         |
| Outcome            | Discharged | 556 (69.4)                         | 496 (65.8)                           | 0.126   |
|                    | Death      | 245 (30.6)                         | 258 (34.2)                           |         |

**Abbreviations.** - COPD: Chronic Obstructive Pulmonary Disease. ICU: intensive care unit

**Supplementary Table S2.** Multivariate analysis showing mortality Odds Ratios (OR) adjusted by all included variables.

| VARIABLES          | CATEGORIES | REFERRAL GROUP<br>OR (95%CI) | VALIDATION GROUP<br>OR (95%CI) |
|--------------------|------------|------------------------------|--------------------------------|
| Age groups (years) | 18–49      | 1                            | 1                              |
|                    | 50–69      | 2.42 (0.99–5.90)             | 1.18 (0.45–3.08)               |
|                    | 70–84      | 9.33 (3.70–23.55)            | 15.41 (6.00–39.61)             |
|                    | ≥85        | 33.97 (13.26–87.01)          | 56.41 (21.44–148.42)           |
| Gender             | Male       | 1                            | 1                              |
|                    | Female     | 0.73 (0.50–1.08)             | 0.82 (0.54–1.24)               |
| DISEASES           |            |                              |                                |
| Hypertension       | No         | 1                            | 1                              |
|                    | Yes        | 0.98 (0.64–1.51)             | 0.70 (0.42–1.17)               |
| Dyslipidemia       | No         | 1                            | 1                              |
|                    | Yes        | 1.10 (0.73–1.64)             | 1.00 (0.63–1.58)               |
| Diabetes mellitus  | No         | 1                            | 1                              |
|                    | Yes        | 1.29 (0.83–1.99)             | 0.78 (0.47–1.28)               |
| Active cancer      | No         | 1                            | 1                              |
|                    | Yes        | 2.74 (1.43–5.25)             | 7.28 (3.08–17.24)              |
| COPD               | No         | 1                            | 1                              |
|                    | Yes        | 1.09 (0.71–1.62)             | 1.17 (0.76–1.69)               |
| ICU admission      | No         | 1                            | 1                              |
|                    | Yes        | 6.70 (3.78–11.87)            | 13.02 (6.48–26.16)             |
| Albumin (g/dL)     | <3.5       | 1                            | 1                              |
|                    | ≥3.5       | 0.56 (0.39–0.82)             | 0.37 (0.25–0.56)               |
| Glucose (mg/dL)    | <100       | 1                            | 1                              |
|                    | 100–125    | 0.95 (0.54–1.64)             | 1.12 (0.63–1.98)               |
|                    | >125       | 1.43 (0.84–2.43)             | 1.94 (1.09–3.45)               |

**Abbreviations.** - COPD: Chronic Obstructive Pulmonary Disease. ICU: intensive care unit. “The value of the Hosmer-Lemeshow goodness-of-fit statistic was 6.06, 10.99 (referral, validation) and the corresponding p-values 0.640, 0.203. This indicates that the models seem to fit quite well.”
